# Supplementary material for: Fabrication of plasmonic dye-sensitized solar cells using ion-implanted photoanodes
Source: Royal Society of Chemistry journal article supplement (doi:10.1039/c9ra02657f), 2019-01-01
Supplement: c9ra02657f1.pdf [file c9ra02657f1.pdf]

## SUPPLEMENTARY DATA

### **Fabrication of Plasmonic Dye Sensitized Solar Cells using Ion Implanted Photoanodes**

Navdeep Kaur,<sup>a</sup> Aman Mahajan,<sup>\*a</sup> Viplove Bhullar,<sup>a</sup> Davinder Paul Singh,<sup>a</sup> Vibha Saxena,<sup>b</sup> A. K. Debnath,<sup>b</sup> D.

K. Aswal,<sup>c</sup> Devarani Devi,<sup>d</sup> Fouran Singh,<sup>d</sup> Sundeep Chopra<sup>d</sup>

<sup>a</sup>Department of Physics, Guru Nanak Dev University, Amritsar -143 005, India

<sup>b</sup>Thin Film Devices Section, Technical Physics Division, Bhabha Atomic Research Centre, Mumbai - 400 085, India

<sup>c</sup>National Physical Laboratory, New Delhi - 110012, India

<sup>d</sup>Inter University Accelerator Centre, New Delhi - 110 0067, India

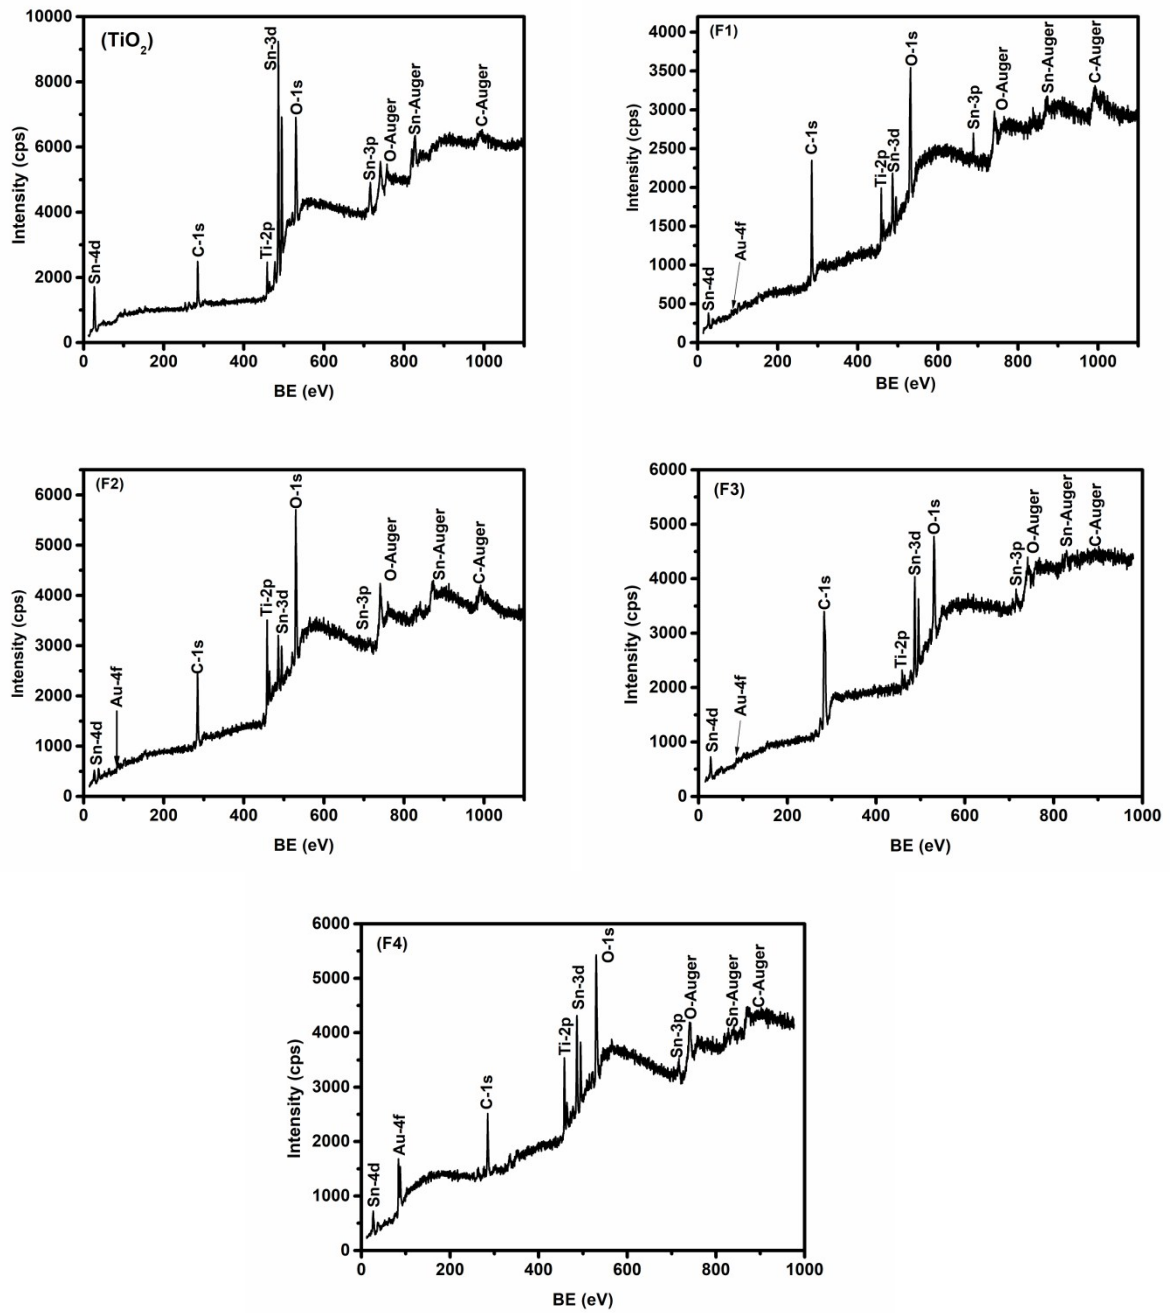

**Fig. S1:** XPS survey spectra of unimplanted  $\text{TiO}_2$  and Au implanted  $\text{TiO}_2$  matrix at different fluence (F1, F2, F3 and F4)

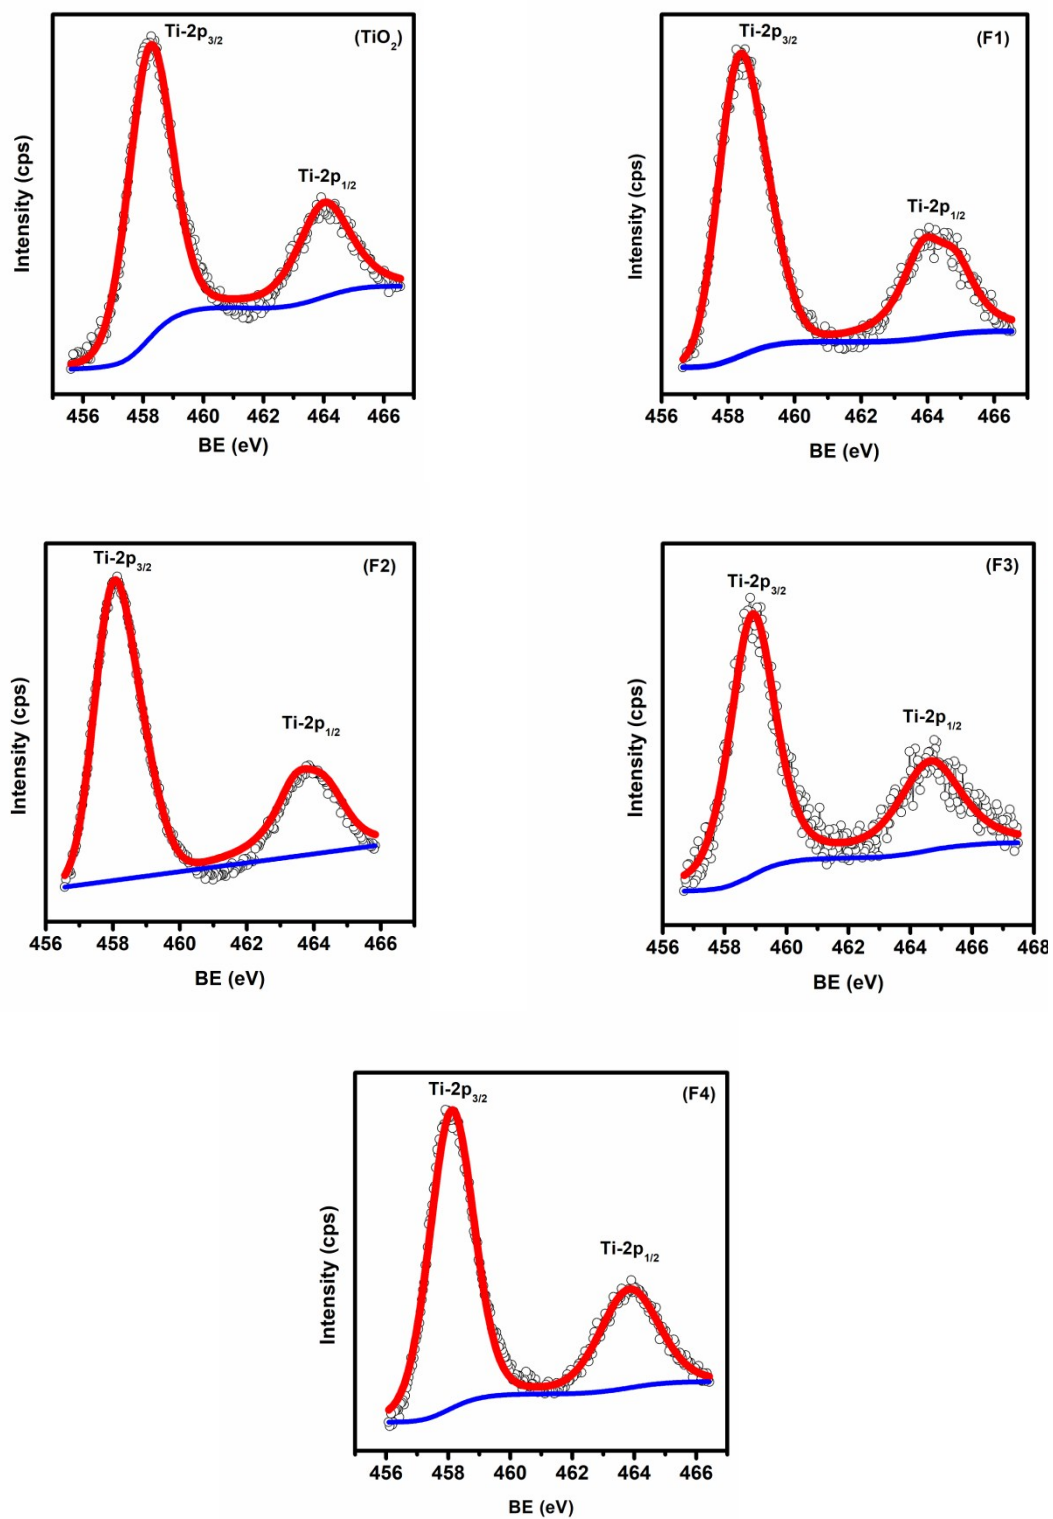

**Fig. S2:** Core-level XPS spectra of Ti-2p unimplanted TiO<sub>2</sub> and Au implanted TiO<sub>2</sub> matrix at different fluence (F1, F2, F3 and F4)

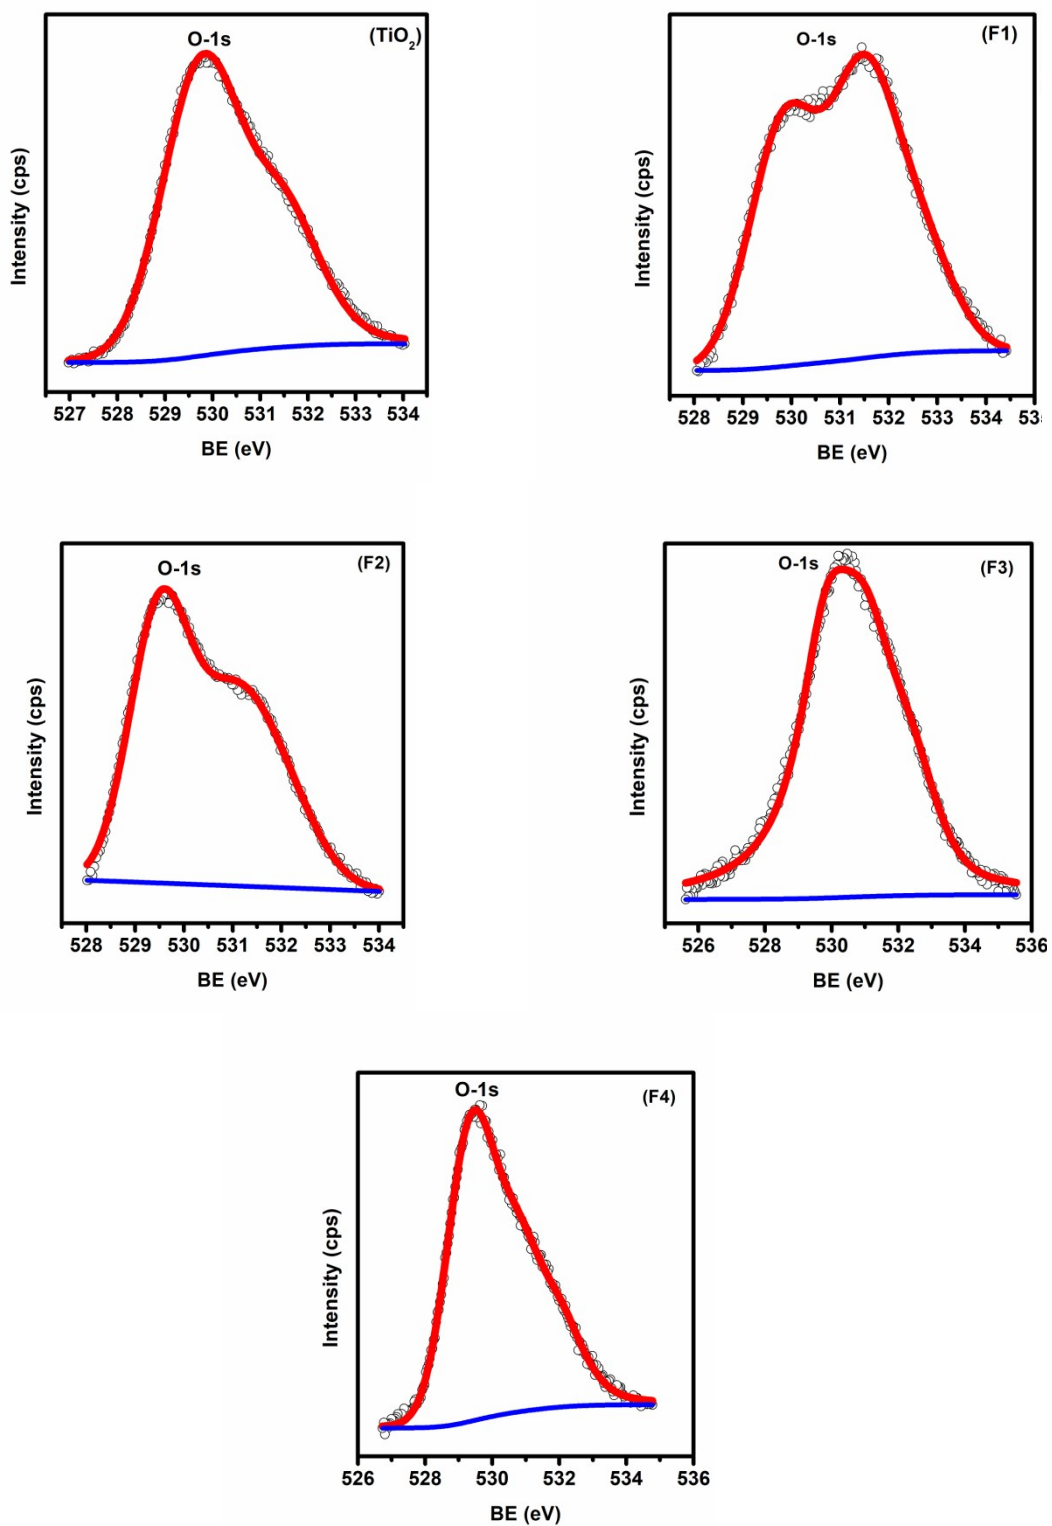

**Fig. S3:** Core-level XPS spectra of O-1s unimplanted TiO<sub>2</sub> and Au implanted TiO<sub>2</sub> matrix at different fluence (F1, F2, F3 and F4)

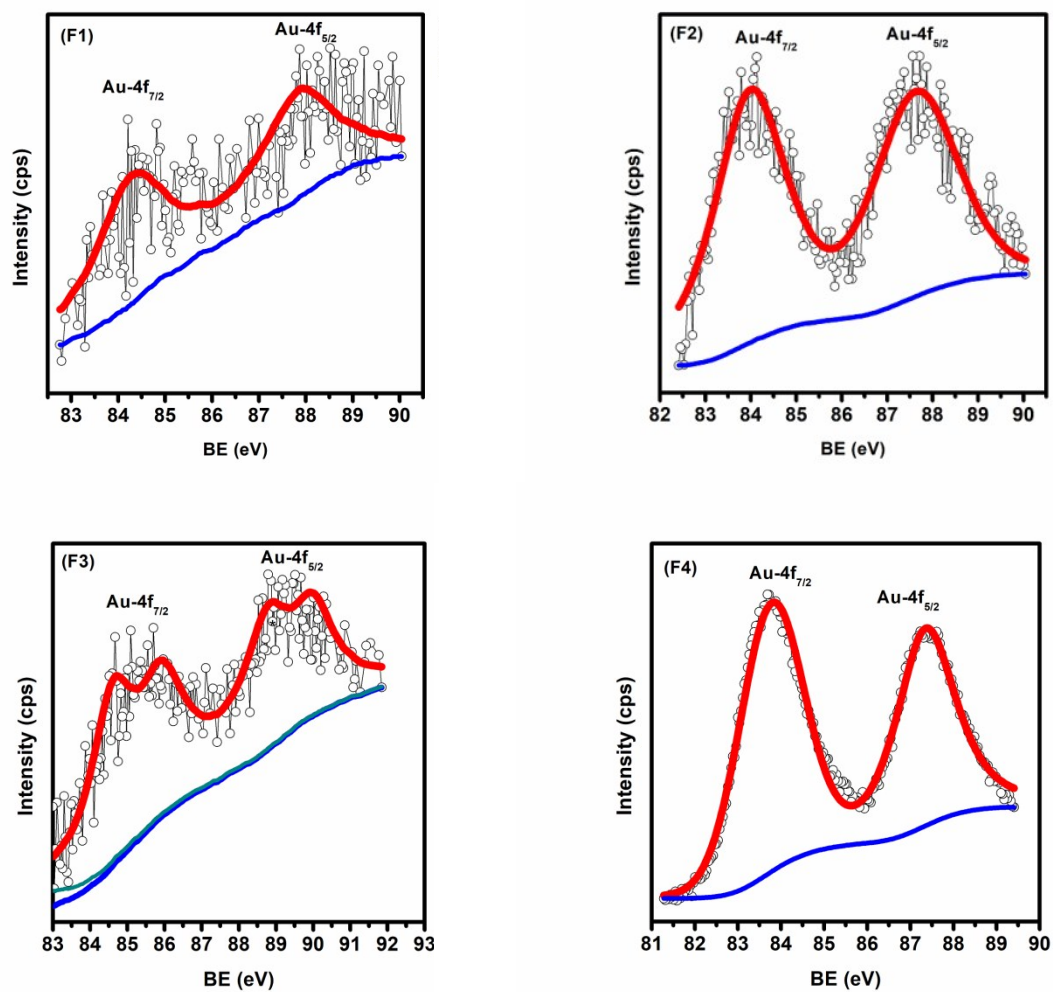

**Fig. S4:** Core-level XPS spectra of Au-4f of Au implanted TiO<sub>2</sub> matrix at different fluence (F1, F2, F3 and F4)
